# Supplementary material
Source: publisher figshare collection journal article supplement (https://karger.figshare.com/ndownloader/files/31559141)
Supplement: Supplementary file 1 [file 31559141]

**Table S2. Correlation coefficient between serum adipsin levels and clinical factors**

|  | Adipsin (ng/mL) | | | |
| --- | --- | --- | --- | --- |
| Unadjusted* | | Adjusted† | |
| r | *P* value | r | *P* value |
| Age (year) | 0.15 | <0.001 | - | - |
| BMI (kg/m2) | 0.38 | <0.001 | 0.39 | ＜0.001 |
| WHR | 0.25 | <0.001 | 0.22 | ＜0.001 |
| SBP (mm/Hg) | 0.19 | <0.001 | 0.15 | ＜0.001 |
| DBP (mm/Hg) | 0.20 | <0.001 | 0.18 | ＜0.001 |
| Insulin (μU/mL) | 0.30 | <0.001 | 0.32 | ＜0.001 |
| HOMA-IR | 0.31 | ＜0.001 | 0.32 | ＜0.001 |
| Alb (g/L) | -0.14 | ＜0.001 | -0.13 | ＜0.001 |
| TC (mmol/L) | -0.05 | 0.129 | -0.03 | 0.350 |
| TG (mmol/L) | 0.22 | ＜0.001 | 0.14 | ＜0.001 |
| HDL-C (mmol/L) | -0.25 | ＜0.001 | -0.24 | ＜0.001 |
| LDL-C (mmol/L) | -0.03 | 0.426 | -0.02 | 0.534 |
| Fasting glucose (mmol/L) | 0.14 | ＜0.001 | 0.19 | ＜0.001 |
| UA (μmol/L) | 0.23 | ＜0.001 | 0.23 | ＜0.001 |
| ALT (U/L) | 0.12 | ＜0.001 | 0.12 | 0.001 |
| AST (U/L) | 0.04 | 0.288 | 0.05 | 0.130 |
| Trunk fat percentage (%) | 0.14 | ＜0.001 | 0.28 | ＜0.001 |
| Physical activities, MET/d | -0.07 | 0.036 | -0.06 | 0.057 |

* Spearman’s correlation analysis was used.

† Partial correlation analysis was used (adjusted for age and sex).
